# Supplementary material for: Spike developmental stages and ABA role in spikelet primordia abortion contribute to the final yield in barley (Hordeum vulgare L.)
Source: Bot Stud. 2019 Jul 10;60:13. doi: 10.1186/s40529-019-0261-2 (PMC6620232; doi:10.1186/s40529-019-0261-2)
Supplement: Supplementary file 3 — Additional file 3: Table S2. Mean values of yield traits, spike length (cm), seed length (mm), seed width (mm), seed area (mm2), number of seeds/plant, seeds weight/plant (g) and 1000-seed weight (TSW) (g) for the five tasted barley genotypes under control and salinity treatment conditions. [file 40529_2019_261_MOESM3_ESM.docx]

Table S2: Mean values of yield traits, spike length (cm), seed length (mm), seed width (mm), seed area (mm2), number of seeds/plant, seeds weight/plant (g) and 1000-seed weight (TSW) (g) for the five tasted barley genotypes under control and salinity treatment conditions.

|  |  | **Ardhaoui** | **Kounouz** | **Lemsi** | **Manel** | **Rihane** |
| --- | --- | --- | --- | --- | --- | --- |
| **Spike length (cm)** | **Control** | 5.58**b | 4.66*c | 4.20**c | 4.74**bc | 5.14**bc |
|  | **Treatment** | 2.86a | 3.23a | 2.86a | 3.13a | 3.57a |
| **Seed Length (mm)** | **Control** | 10.93nsa | 8.69*b | 8.43*b | 9.13*b | 10.54nsa |
|  | **Treatment** | 10.61c | 7.99d | 7.76d | 8.40d | 10.27c |
| **Seed Width (mm)** | **Control** | 3.07*a | 3.21nsab | 3.04nsa | 3.33nsb | 3.10nsa |
|  | **Treatment** | 2.84c | 3.05d | 2.89c | 3.17d | 3.06d |
| **seed Area (mm2** **)** | **Control** | 22.71*a | 18.37*c | 17.36*c | 20.06*b | 22.11*a |
|  | **Treatment** | 20.41d | 16.53e | 15.62e | 18.05f | 16.52e |
| **N. Seeds/plant** | **Control** | 89.67**a | 87.20**a | 101.20**ab | 100.20**ab | 117.11**b |
|  | **Treatment** | 14.90c | 14.71c | 6.10d | 16.14c | 36.29e |
| **Seeds Weight (g)** | **Control** | 2.52**a | 2.87**a | 2.79**a | 2.97**a | 3.76**b |
|  | **Treatment** | 0.33c | 0.45c | 0.14d | 0.55c | 1.29d |
| **TSW (g)** | **Control** | 29.40**f | 33.00*e | 27.76**f | 37.34**e | 35.22nse |
|  | **Treatment** | 18.19a | 28.36c | 15.92a | 24.61b | 31.18d |

Red stars and non-significant ‘ns’ show the significant differences between the control and salinity treatment for each genotype. Black letters show the significant differences among the genotypes and genotypes-treatment interactions. Significant differences has been calculated using R 3.5.3.
